# Supplementary material for: A spherical deca-vanadophosphate covalent assembled all-inorganic open framework
Source: Royal Society of Chemistry journal article supplement (doi:10.1039/c6dt03850f), 2017-01-01
Supplement: c6dt03850f1.pdf [file c6dt03850f1.pdf]

# **Spherical deca-vanadophosphate covalent assembled all-inorganic open framework**

**Hailiang Hu, Zhenyu Guo, Kaixuan Li, Xiaoling Lin, Yang Liu,\* and Zhenhui Kang\***

## **Supporting Information**

### **Experimental**

#### **Materials and Measurements.**

All materials were reagent grade obtained from commercial sources and used without further purification. IR spectrum was recorded in the range 4000-400  $\text{cm}^{-1}$  on a HYPERION spectrometer with a pressed KBr pellet. UV-Vis absorption was recorded on a Lambda 750 (Perking Elmer) spectrophotometer in the wavelength range of 300-800 nm at room temperature. The thermogravimetric analysis (TGA) was carried out by Universal Analysis 2000 TG analyzer in  $\text{N}_2$  and air with a heating rate of 10  $^\circ\text{C}/\text{min}$ , respectively. Powder X-ray diffraction (XRD) data were collected on an X'Pert-ProMPD (Holand) D/max- $\gamma$ A X-ray diffractometer with Cu  $\text{K}\alpha$  radiation in a flat plate geometry. The gas-sorption experiments (up to 1 atm) were performed on ASAP 2020 and 2050 Xtended Pressure Sorption Analyzer. Scanning electron microscopy (SEM) and Energy-dispersive X-ray (EDX) analysis were performed on a FEI/Philips Tecnai 12 BioTWIN transmission electron micro-scope. The X-ray Photoelectron Spectroscopy (XPS) spectra were obtained with a KRATOS Axis ultra DLD X-ray photoelectron spectrometer with a monochromatised Mg  $\text{K}\alpha$  X-55 ray ( $h\nu = 1283.3$  eV). XPS samples were prepared by pressing the powder material into an indium support. Electrochemical measurements were performed with a CHI 660E workstation (CH Instruments, Chenhua, Shanghai, China). All electrochemical experiments were

carried out at room temperature. The electrocatalytic activity of **1** was tested in a conventional three-electrode cell. A saturated calomel electrode Ag/AgCl was used as a reference electrode (SCE), and a Pt wire was used as a counter electrode. Chemically bulk-modified carbon paste electrode (CPE) was used as the working electrode. Mott-Schottky plot was performed within the potential region of -0.50 to 1.2 V. An amplitude of 20 mV was applied, and the measured frequency was 1 kHz.

## **Theoretical methods**

Optimized geometry was achieved using the B3LYP functional and LANL2DZ basis set for all complexes studied in this work. All calculations were performed using the Gaussian 09 package.

## **Synthesis.**

A mixture of  $\text{NH}_4\text{VO}_3$  (1.7 mmol),  $\text{NaH}_2\text{PO}_4$  (0.5 mmol) and dmmt (0.46 mmol) was dissolved in 10.0 mL of distilled water and stirred briefly for 1.0 h. When the pH value was adjusted to about 8.7 with 1,4-butanediamine, the mixture was sealed into a 15 mL Teflon-lined autoclave and kept under autogenous pressure at 160 °C for 3 days. After cooling to room temperature slowly, black cubic crystals of **1** were filtered and washed with distilled water. (Yield about 35% based on V). IR (KBr pellet,  $\text{cm}^{-1}$ ): 3440 (s), 1629 (m), 1401 (s), 1009 (s), 617 (m), 538 (w).

## **Preparations of 1-CPE.**

Compound **1** modified carbon paste electrode (1-CPE) was fabricated as follows: 90 mg of graphite powder and 8 mg of compound **1** were mixed and ground together by an agate mortar and pestle to achieve a uniform mixture, and then 0.1 mL of Nujol was added with stirring. The homogenized mixture was packed into a glass tube with a 3.0 mm inner diameter, and the tube surface was wiped with weighing paper. Electrical contact was established with a copper rod through the back of the electrode.

## X-ray Crystallographic Study.

Crystal data for compound **1** were collected on a Bruker APEX-II CCD diffractometer with Mo K $\alpha$  radiation ( $\lambda = 0.71073 \text{ \AA}$ ). The structures were solved by the direct methods and refined by full-matrix least-squares on  $F^2$  using the *SHELXTL* crystallographic software package.<sup>1</sup> All non-hydrogen atoms were refined anisotropically. Hydrogen atoms attached to water molecule of O2W can't be generated and were included in the molecular formula directly. CCDC number is 1486615 for compound **1**.

Crystal data for **1**: H<sub>42</sub>N<sub>9</sub>O<sub>54</sub>P<sub>6</sub>V<sub>15</sub>,  $M = 1982.34$ , black crystal, Cubic, space group *Im-3m*,  $a = 16.0271(5) \text{ \AA}$ ,  $\beta = 90^\circ$ ,  $V = 4116.8(4) \text{ \AA}^3$ ,  $Z = 2$ ,  $T = 298 \text{ K}$ ,  $\rho_c = 1.599 \text{ g}\cdot\text{cm}^{-3}$ ,  $\mu = 1.818 \text{ mm}^{-1}$ ,  $R_1 [I > 2\sigma(I)] = 0.0842$ ,  $wR_2 [\text{all data}] = 0.2560$ , GOF = 1.164.

## Reference

- 1 (a) G. M. Sheldrick, *SHELXS-97, Program for solution of crystal structures*, University of Göttingen, Germany, 1997; (b) G. M. Sheldrick, *SHELXL-97, Program for refinement of crystal structures*, University of Göttingen, Germany, 1997.

**Table S1** Selected Bond lengths (Å) and angles (°) by X-ray and DFT calculations.

| Bond Lengths                                | Exp.      | Cal.      | Bond Angles                                       | Exp.       | Cal.      |
|---------------------------------------------|-----------|-----------|---------------------------------------------------|------------|-----------|
| P(1)-O(4) <sup>#9</sup>                     | 1.532(5)  | 1.77972   | O(4) <sup>#9</sup> -P(1)-O(4) <sup>#10</sup>      | 110.3(4)   | 109.79631 |
| P(1)-O(4) <sup>#10</sup>                    | 1.532(5)  | 1.61165   | O(4) <sup>#9</sup> -P(1)-O(4)                     | 109.07(18) | 97.00669  |
| P(1)-O(4)                                   | 1.532(5)  | 1.61165   | O(4) <sup>#10</sup> -P(1)-O(4)                    | 109.07(18) | 109.79631 |
| P(1)-O(4) <sup>#11</sup>                    | 1.532(5)  | 1.77972   | O(4) <sup>#9</sup> -P(1)-O(4) <sup>#11</sup>      | 109.07(18) | 109.79631 |
| V(1)-O(1)                                   | 1.61(2)   | 1.63210   | O(4) <sup>#10</sup> -P(1)-<br>O(4) <sup>#11</sup> | 109.07(18) | 118.51878 |
| V(1)-O(2) <sup>#1</sup>                     | 1.931(9)  | 1.88940   | O(4)-P(1)-O(4) <sup>#11</sup>                     | 109.07(18) | 109.79631 |
| V(1)-O(2)                                   | 1.931(9)  | 2.03217   | O(1)-V(1)-O(2) <sup>#1</sup>                      | 111.6(3)   | 115.96426 |
| V(1)-O(2) <sup>#2</sup>                     | 1.931(9)  | 1.88940   | O(1)-V(1)-O(2)                                    | 111.6(3)   | 115.96426 |
| V(1)-O(2) <sup>#3</sup>                     | 1.931(9)  | 2.03217   | O(2) <sup>#1</sup> -V(1)-O(2)                     | 82.2(2)    | 81.11140  |
| V(2)-O(3) <sup>#6</sup>                     | 1.600(11) | 1.61609   | O(1)-V(1)-O(2) <sup>#2</sup>                      | 111.6(3)   | 115.96426 |
| V(2)-O(3)                                   | 1.600(11) | 1.61609   | O(2) <sup>#1</sup> -V(1)-O(2) <sup>#2</sup>       | 136.6(6)   | 138.66748 |
| V(2)-O(2) <sup>#1</sup>                     | 1.931(9)  | 1.88087   | O(2)-V(1)-O(2) <sup>#2</sup>                      | 79.5(12)   | 81.11098  |
| V(2)-O(2)                                   | 1.931(9)  | 2.00617   | O(1)-V(1)-O(2) <sup>#3</sup>                      | 111.6(3)   | 115.96426 |
| V(2)-O(4)                                   | 2.031(4)  | 2.01567   | O(2) <sup>#1</sup> -V(1)-O(2) <sup>#3</sup>       | 82.2(2)    | 81.11098  |
| Bond Angles                                 | Exp.      | Cal.      | Bond Angles                                       | Exp.       | Cal.      |
| O(2)-V(1)-O(2) <sup>#3</sup>                | 136.7(6)  | 128.07016 | O(2) <sup>#1</sup> -V(2)-O(2)                     | 80.8(5)    | 81.11140  |
| O(2) <sup>#2</sup> -V(1)-O(2) <sup>#3</sup> | 84.9(12)  | 83.83424  | O(2)-V(2)-O(4)                                    | 146.9(4)   | 138.12693 |
| O(2) <sup>#1</sup> -V(2)-O(4) <sup>#7</sup> | 147.7(4)  | 138.12693 | O(3)-V(2)-O(4)                                    | 112.3(12)  | 111.29556 |
| O(3) <sup>#6</sup> -V(2)-O(2)               | 108.3(13) | 111.29556 | O(4)-V(2)-O(4) <sup>#7</sup>                      | 81.5(2)    | 81.11140  |

Symmetry transformations used to generate equivalent atoms: #1 x, -z+2, y; #2 x, -z+2, -y+2; #3 x, -y+2, -z+2; #4 x, -y+2, z; #5 x, y, -z+2; #6 x, z, y; #7 -x+1, z, y; #9 y-1/2, -x+3/2, -z+3/2; #10 -x+1, -y+2, z; #11 -y+3/2, x+1/2, -z+3/2.

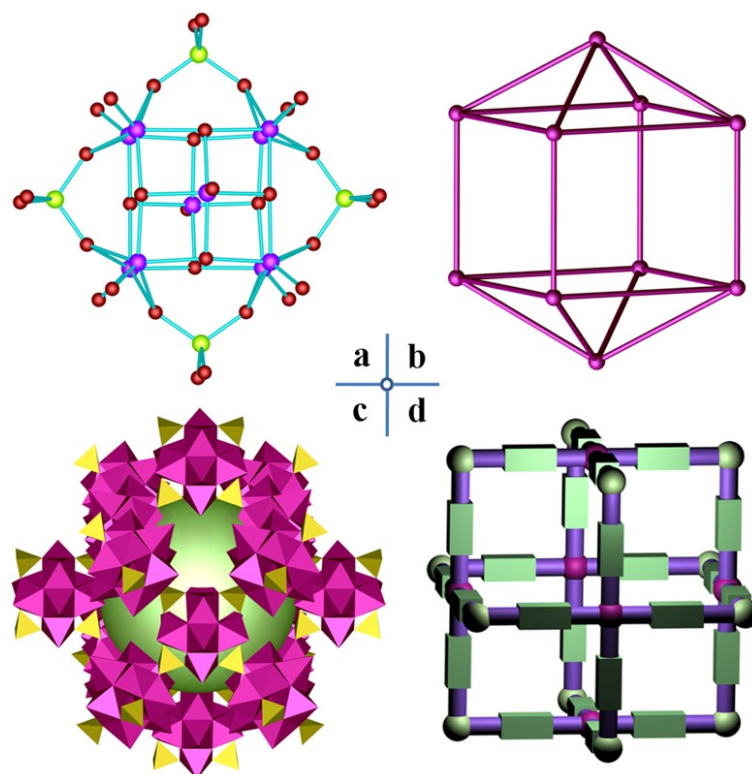

**Fig. S1** Ball and stick representation of spherical hollow  $\{P_4V_{10}\}$  cluster (a), and the  $\{V_{10}\}$  dodecahedron (b). Nanosized  $\{(P_4V_{10})_{18}\}$  cage (c). Perspective view of the truncated cuboctahedral cube (d).

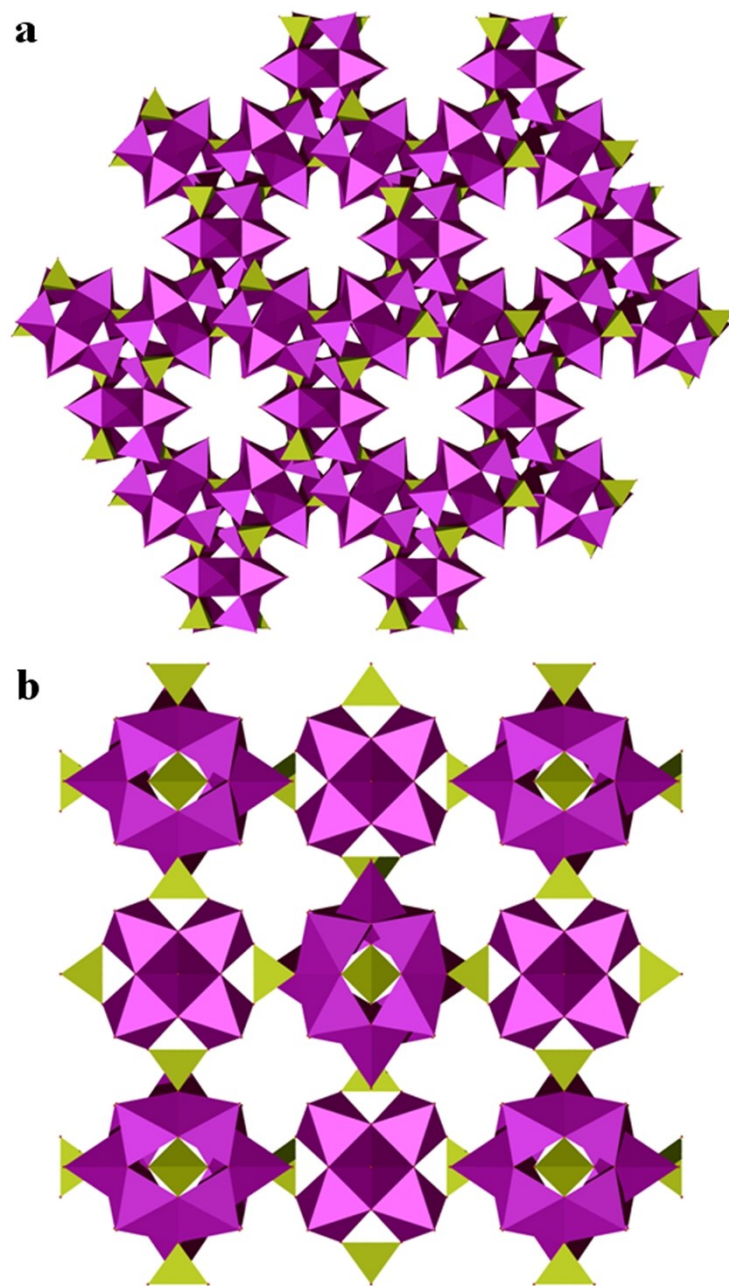

**Fig. S2** Channel system of **1** that view along  $[111]$  direction (a), and  $[100]$  direction (b).

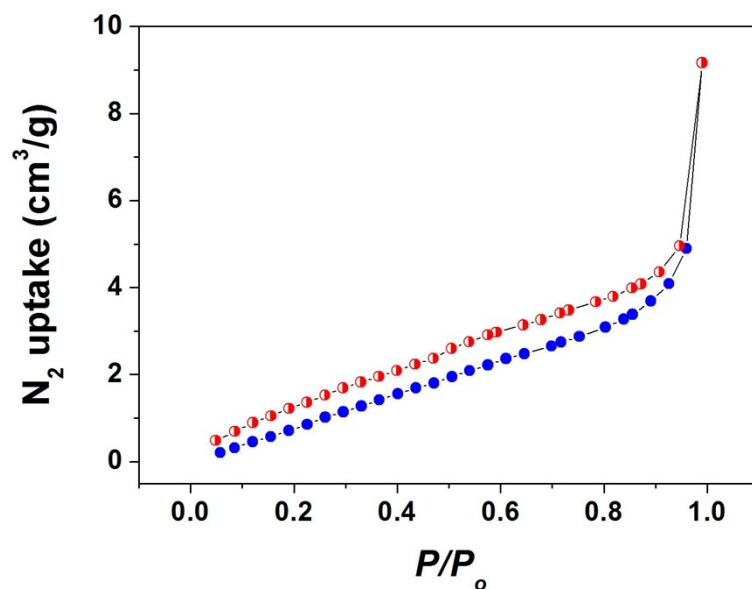

Fig. S3  $N_2$  adsorption–desorption isotherms measured at 77 K for compound **1**.

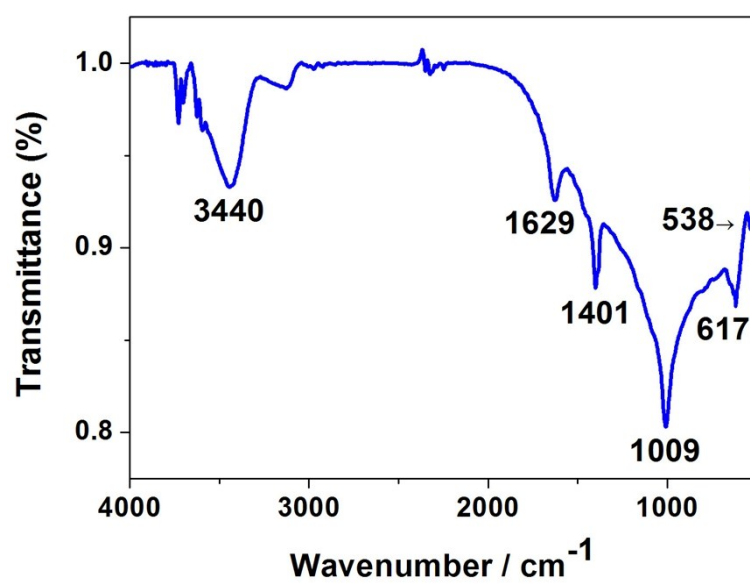

Fig. S4 FT-IR spectrum of compound **1**.

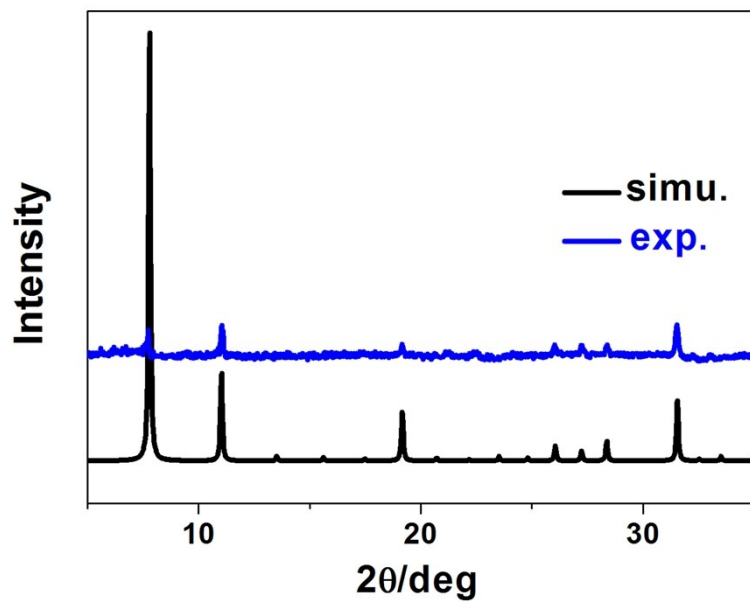

**Fig. S5** Simulated and experimental XRD patterns of compound **1**. The diffraction peaks match well, indicating the good phase purity.

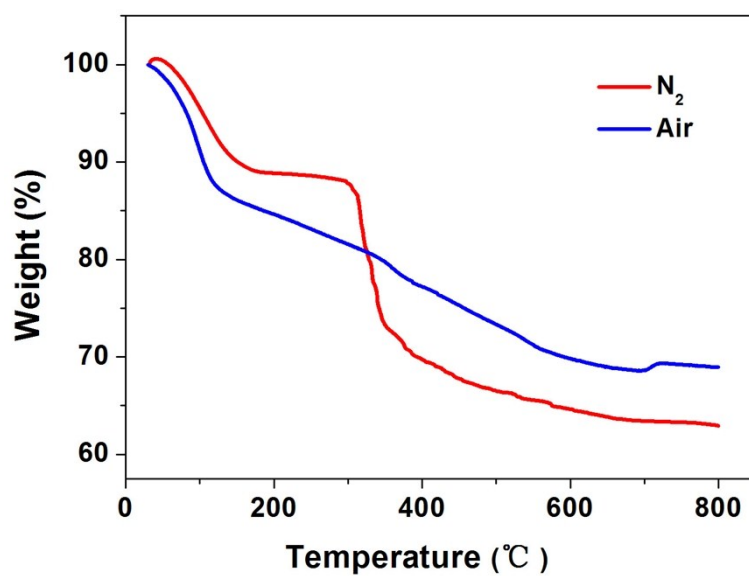

**Fig. S6** TG curves of compound **1**. TG analysis was carried out with a heating rate of 10 °C/min under air and nitrogen flows, respectively.



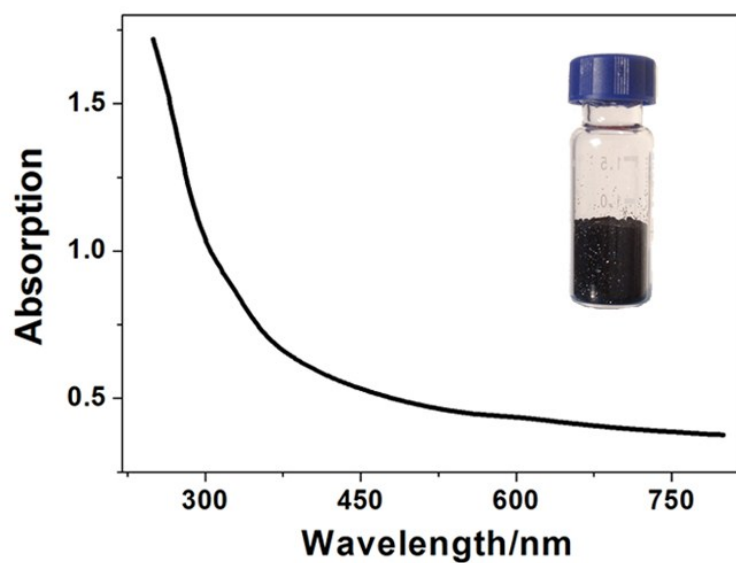

**Fig. S7** The UV-vis spectrum and photograph image of black crystals **1**.

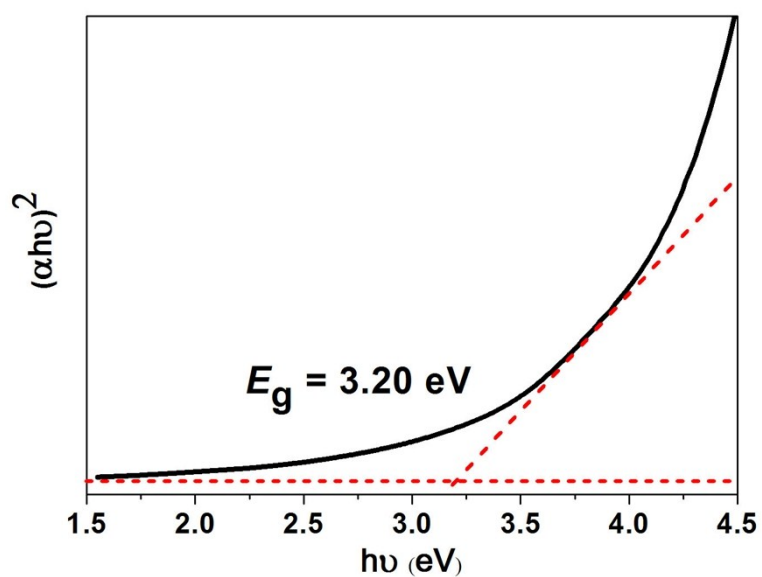

**Fig. S8** The  $(\alpha h\nu)^2$  vs.  $h\nu$  curve of compound **1**. The dashed red lines mark the baseline and the tangent of the curve. When using  $r = 2$ , no good linear fit is obtained, and the band gap is estimated over 3.0 eV (intersection value).

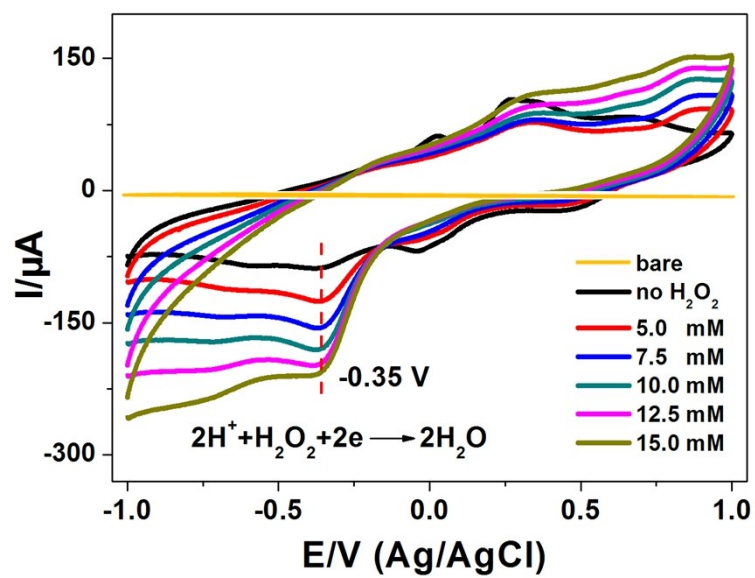

**Fig. S9** CV curves of compound **1** in the presence of H<sub>2</sub>O<sub>2</sub> with different concentrations (scan rate: 20 mv s<sup>-1</sup>).
